# Supplementary material
Source: PubMed Central journal article supplement (PMC10538409)
Supplement: NIHMS1922754-supplement-Supplemental_Publication_Material.pdf [file NIHMS1922754-supplement-Supplemental_Publication_Material.pdf]

## **SUPPLEMENTAL MATERIALS**

### **Subtyping Severe Hypercholesterolemia by Genetic Determinant to Stratify Risk of Coronary Artery Disease**

Alexander S.F. Berry, PhD<sup>a</sup>, Laney K. Jones, PharmD, MPH<sup>b,c</sup>, Eric J. Sijbrands, MD, PhD<sup>d</sup>, Samuel S. Gidding, MD<sup>b\*</sup>, and Matthew T. Oetjens, PhD<sup>a\*</sup>

a Autism and Developmental Medicine Institute, Geisinger, Lewisburg, PA 17837

b Department of Genomic Health, Geisinger, Danville, PA 17821

c Heart and Vascular Institute, Geisinger, Danville, PA 17821

d Department of Internal Medicine, Erasmus MC, University Medical Center Rotterdam, PO-box 2040, 3000 CA Rotterdam, The Netherlands.

\*Authors jointly supervised this manuscript

## Table of Contents

| Page No. | Title                                                                                                                                                                                                                                                                                |
|----------|--------------------------------------------------------------------------------------------------------------------------------------------------------------------------------------------------------------------------------------------------------------------------------------|
| 3        | Major Resources Tables                                                                                                                                                                                                                                                               |
| 4        | Supplemental Methods                                                                                                                                                                                                                                                                 |
| 6        | Figure S1. Clinical risk factors and comorbidities associated with genetic severe hypercholesterolemia subtypes compared to the non-genetic subtype.                                                                                                                                 |
| 7        | Figure S2. LLM use by FH subtype.                                                                                                                                                                                                                                                    |
| 8        | Figure S3. Family history of heart disease.                                                                                                                                                                                                                                          |
| 9        | Figure S4. 10-year incident CAD risk by monogenic FH gene.                                                                                                                                                                                                                           |
| 10       | Figure S5. Severe hypercholesterolemia stratified by genetic subtype using genetically predicted Lp(a).                                                                                                                                                                              |
| 11       | Figure S6. Severe hypercholesterolemia stratified by LDL-C and genetic subtype in males and females.                                                                                                                                                                                 |
| 12       | Figure S7. LLM use by monogenic FH variant.                                                                                                                                                                                                                                          |
| 13       | Table S1. Monogenic FH variant list.                                                                                                                                                                                                                                                 |
| 18       | Table S2. UK Biobank codes and measurements used for identification of secondary exclusions of FH.                                                                                                                                                                                   |
| 19       | Table S3. UK Biobank codes used for identification of lipid-lowering medication use.                                                                                                                                                                                                 |
| 20       | Table S4. LDL Polygenic score correlation with adjusted and unadjusted LDL-C.                                                                                                                                                                                                        |
| 21       | Table S5. Monogenic variant correlation with adjusted and unadjusted LDL-C.                                                                                                                                                                                                          |
| 22       | Table S6. Determinant and subtype definitions.                                                                                                                                                                                                                                       |
| 23       | Table S7. UK Biobank codes used for identification of CAD and comorbidities                                                                                                                                                                                                          |
| 25       | Table S8. Familial hypercholesterolemia variant counts.                                                                                                                                                                                                                              |
| 26       | Table S9. Prevalence in the cohort, odds ratios of having severe hypercholesterolemia, population attributable fraction of severe hypercholesterolemia, and attributable risk proportion of severe hypercholesterolemia for each genetic determinant of severe hypercholesterolemia. |
| 27       | Table S10. Absolute 10-year incident CAD risk difference.                                                                                                                                                                                                                            |
| 28       | Table S11. 10-year incident ASCVD risk re-defining polygenic FH.                                                                                                                                                                                                                     |
| 29       | Table S12. Clinical characteristics and comorbidities of LLM-treated vs untreated.                                                                                                                                                                                                   |
| 31       | Table S13. 10-year incident CAD risk in treated vs. untreated UK Biobank participants with severe hypercholesterolemia.                                                                                                                                                              |
| 32       | Table S14. 10-year incident ASCVD risk controlling for body mass index and C reactive protein.                                                                                                                                                                                       |

## Major Resources Tables

### Animals (in vivo studies)

| Species | Vendor or Source | Background Strain | Sex | Persistent ID / URL |
|---------|------------------|-------------------|-----|---------------------|
| NA      | NA               | NA                | NA  | NA                  |

### Genetically Modified Animals

|                 | Species | Vendor or Source | Background Strain | Other Information | Persistent ID / URL |
|-----------------|---------|------------------|-------------------|-------------------|---------------------|
| Parent - Male   | NA      | NA               | NA                | NA                | NA                  |
| Parent - Female | NA      | NA               | NA                | NA                | NA                  |

### Antibodies

| Target antigen | Vendor or Source | Catalog # | Working concentration | Lot # (preferred but not required) | Persistent ID / URL |
|----------------|------------------|-----------|-----------------------|------------------------------------|---------------------|
| NA             | NA               | NA        | NA                    | NA                                 | NA                  |

### DNA/cDNA Clones

| Clone Name | Sequence | Source / Repository | Persistent ID / URL |
|------------|----------|---------------------|---------------------|
| NA         | NA       | NA                  | NA                  |

### Cultured Cells

| Name | Vendor or Source | Sex (F, M, or unknown) | Persistent ID / URL |
|------|------------------|------------------------|---------------------|
| NA   | NA               | NA                     | NA                  |

### Data & Code Availability

| Description                                   | Source / Repository     | Persistent ID / URL |
|-----------------------------------------------|-------------------------|---------------------|
| UK Biobank EHR, self-report, and genetic data | UK Biobank              | NA                  |
| Data analysis                                 | Upon request to authors | NA                  |

### Other

| Description | Source / Repository | Persistent ID / URL |
|-------------|---------------------|---------------------|
| NA          | NA                  | NA                  |

## Supplemental Methods

### *Genotype and Exome Sequence Data*

Whole exome sequencing data for 200,602 participants was performed by Regeneron Genetics Center using IDT's xGen probe library and the Illumina NovaSeq 6000 sequencing platform. To identify monogenic causes of FH, we examined exome sequence data collected on the 149,326 UK Biobank participants that passed exclusion criteria. Variants were filtered if they failed to meet QC metrics stored in the VCF file: DP  $\geq 10$ , GQ  $\geq 20$  and AB  $\geq 0.2$ . To assess functional consequences and pathogenicity of variants, we first annotated the exome sequences with the Ensembl Variant Effect Predictor (release 99)<sup>45</sup> and ClinVar (February 2021)<sup>46</sup>.

Exome sequences were screened for FH-causing variants in *LDLR* (NM\_000527.4), *APOB* (NM\_000384.2), and *PCKS9* (NM\_174936.3). An FH-causing variant was defined as 1) a putative loss-of-function (pLOF) variant in *LDLR* except those in the first, penultimate or last exon, 2) a variant classified in ClinVar as pathogenic/likely pathogenic (P/LP) with at least two review stars and at least one submission from a clinical laboratory or 3) a variant interpreted as P/LP by an American Board of Genetics and Genomics (AMBG)-certified clinical geneticist (n = 49 unique variants) reported in previous publication<sup>47</sup>.

### *LDL-C and Lipoprotein(a)*

LDL-C was measured by enzymatic protective selection analysis on a Beckman Coulter AU5800. LDL-C measurements from UK Biobank field 30780 were used. Lp(a) was measured during the baseline interview by immunoturbidimetric analysis on a Randox AU5800. Lp(a) measurements from UK Biobank field 30790 were used. For measurements outside of the reportable range, measurements found in UK Biobank Return 2321 were used.

### *LDL-C and Lp(a) Polygenic Scores*

Genotype array data (UK BiLEVE array) available through the UK Biobank was used to calculate the LDL-C and Lp(a) genetic instruments. These data were imputed to the Haplotype Reference Consortium (HRC) reference panel and available for 200,602 participants<sup>17</sup>. We restricted the HRC genotypes to  $\sim 15.0$  million biallelic variants with an imputation  $r^2 \geq 0.3$ , minor allele frequency [MAF]  $\geq 0.001$ .

Polygenic hypercholesterolemia is defined as a high LDL-C in the presence of a hypercholesterolemia polygenic score in the 90th percentile. We calculated a hypercholesterolemia polygenic score on our sample using the software tool PRS-CS<sup>48</sup>. We set the global shrinkage parameter ( $\phi$ ) of PRS-CS to auto, which means that the parameter is learnt from the data using a fully Bayesian approach. For variant weights, we used the summary statistics from a GWAS of quantitative LDL-C levels (inverse-normal transformed) on a European ancestry sample reported by the Global Lipids Genetics Consortium<sup>7</sup>. The GWAS withheld the UK Biobank sample from the analysis and included 842,660 samples in total. The resulting LDL-C polygenic score included 913,492 SNPs. With this polygenic score in hand, we computed the distribution in the UK Biobank using the PLINK2.0 score function<sup>49</sup>.

For our study of genetically predicted Lp(a), we used the same genetic instrument for predicted Lp(a) levels created by Burgess et al.<sup>18</sup> and reported in the UK Biobank by

Trinder et al.<sup>5</sup> We recreated the distribution of the Lp(a) genetic predictor in the UK Biobank from the 43 variant weights using the PLINK2.0 score function. In a generalized linear model, measured Lp(a)  $\geq 125$ nmol/L correlated with genetically predicted Lp(a)  $\geq 125$ nmol/L with an area-under-the-curve of 0.86.

#### *LDL-C Adjustment*

We expect genetic variables associated with LDL-C – the LDL-C polygenic score and rare monogenic FH variants – to have a stronger correlation with untreated LDL-C values as this is more representative of an individual’s baseline physiology, produced in part by genetics. On the other hand, by altering LDL-C levels, LLM introduces noise into statistical models and weakens the association with genetic variables. To determine if adjusting LDL-C by dividing direct LDL-C by 0.7 in those using LLM approximates the untreated state, we compared the correlation between genetic variables and LDL-C levels in a subset of the cohort untreated for LLM ( $n = 111,896$ ). Next, to test if our adjustment of LDL-C values by LLM use is more representative of untreated LDL-C, we compared the association between genetic variables and LDL-C values before and after adjustment by LLM usage. Adjusted LDL-C values were more strongly associated with the LDL-C polygenic score and monogenic FH compared to the unadjusted values. The correlation between genetic variables and adjusted LDL-C was nearly identical to the correlation in the untreated group, supporting our approach to LDL-C adjustment (Tables S4 and S5).

#### *AHA Lifestyle Score*

The American Heart Association’s (AHA) Lifestyle Score ranks behaviors based on poor, intermediate, and ideal categories for smoking, BMI, and physical activity. These categories were defined based on the American Heart Association’s 2020 Strategic Impact Goal guideline<sup>50</sup>. Here, we defined an ideal diet based on the ideal intake of dietary components for cardiovascular health<sup>51</sup>. The AHA Lifestyle Score was poor if the participant had at least 3 poor lifestyle factors, ideal if a participant had at least 3 ideal lifestyle factors, and intermediate if they had any other combination of lifestyle factors. Lifestyle score was considered an ordered factor with three levels: poor, intermediate, and ideal.

**Figure S1. Clinical risk factors and comorbidities associated with genetic severe hypercholesterolemia subtypes compared to the non-genetic subtype.** Forest plots show the differences in baseline A) clinical risk factors, and B) prevalence of comorbidities in those with each genetic subtype compared to the non-genetic subtype. Continuous variables were converted to z-scores. Coefficients (z-scores for continuous traits and beta for binary traits) for clinical characteristics and odds ratios for comorbidities with 95% confidence intervals are shown. LLM=lipid-lowering medication; T1D=type 1 diabetes; T2D=type 2 diabetes; CAD=coronary artery disease; CVD=cardiovascular disease; PAD=peripheral artery disease; AVS=aortic valve stenosis).

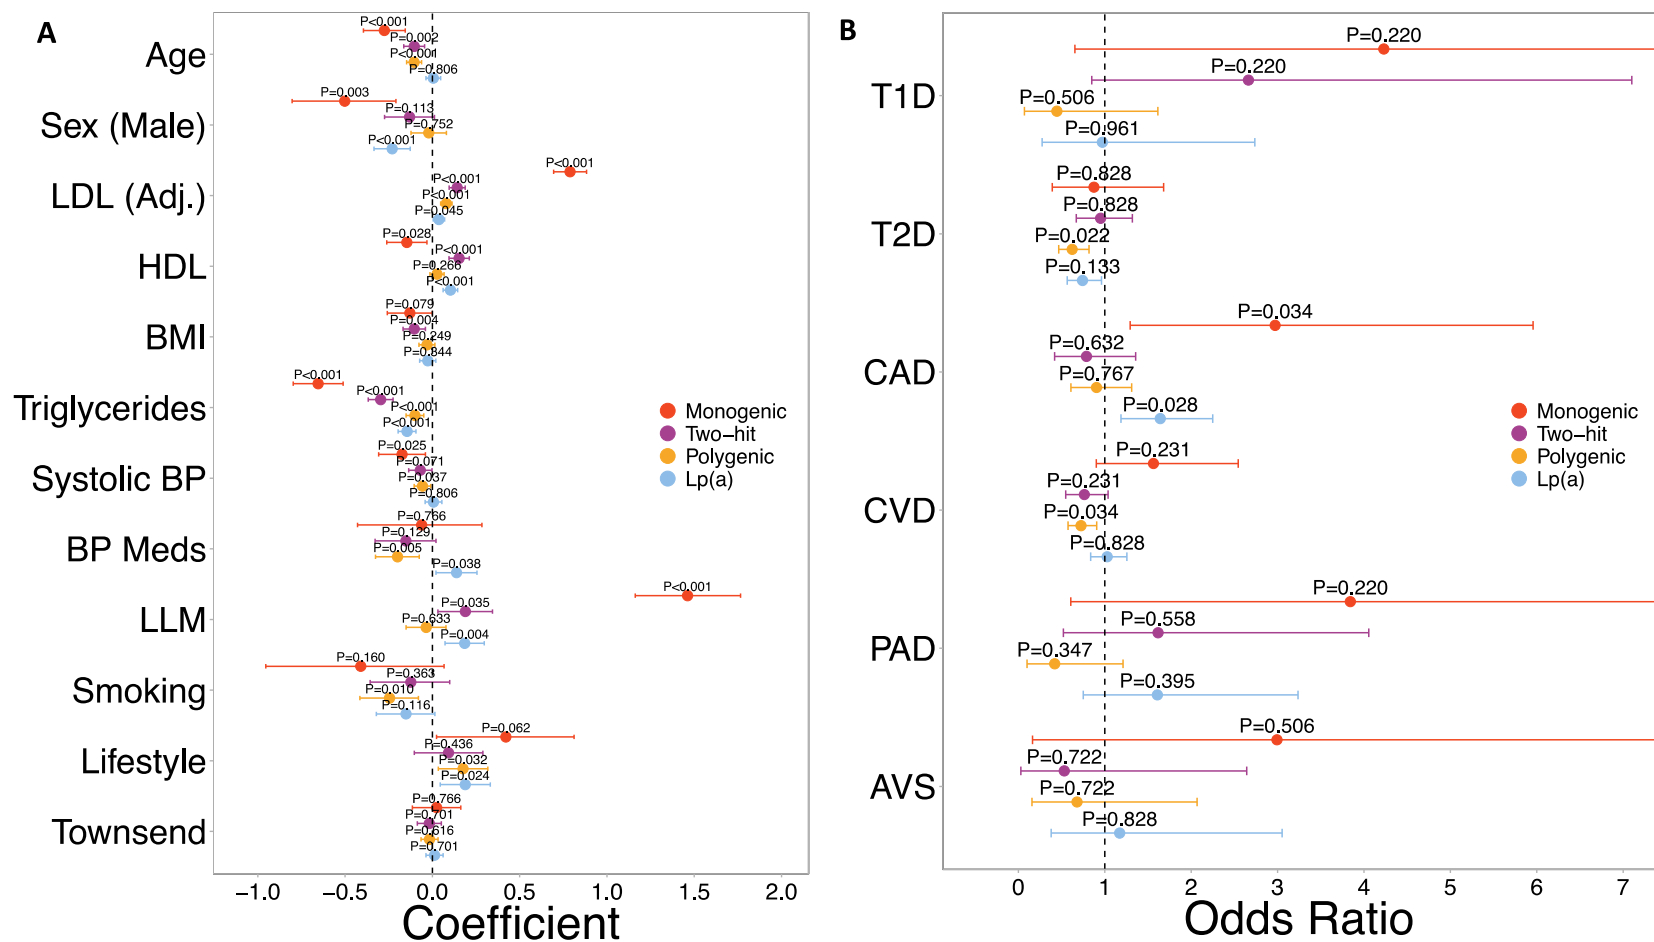

**Figure S2. LLM use by FH subtype.** LLM use varies by FH subtype. LLM use was stratified by the medication used and is shown for each FH subtype and controls. “Unspecified” includes self-reported LLM use without documentation for a specific LLM.

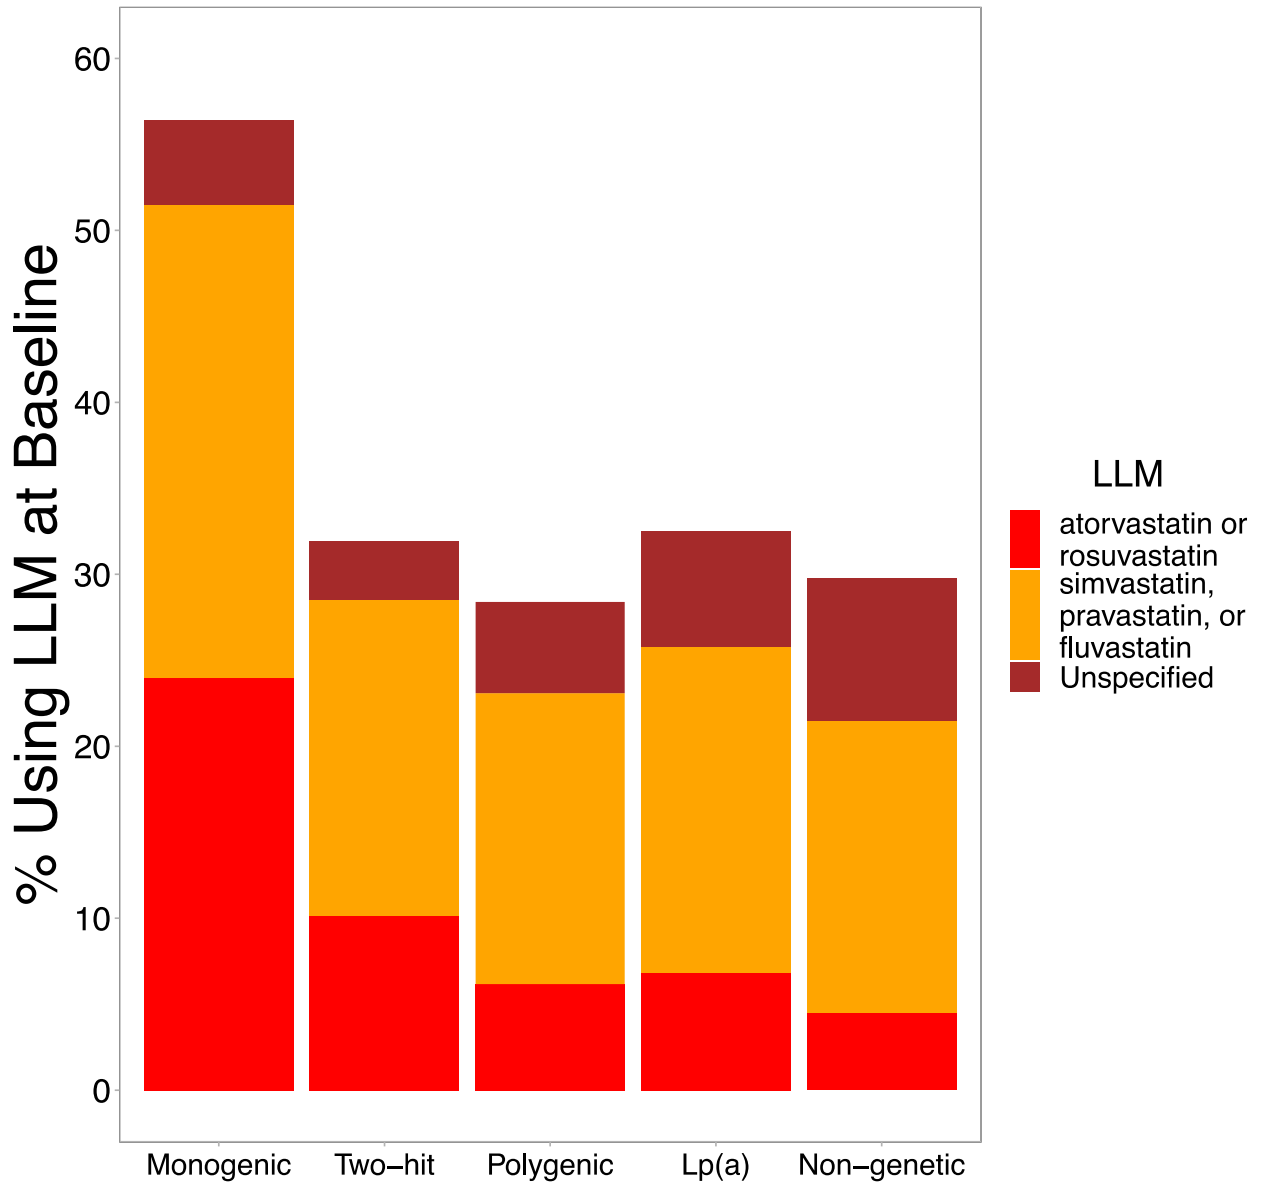

**Figure S3. Family history of heart disease.** Forest plots show odds ratios for the likelihood that UK Biobank participants with an FH subtype reported having a father, mother, or sibling with heart disease compared to the general population. Family history represents any combination of father, mother, and sibling.

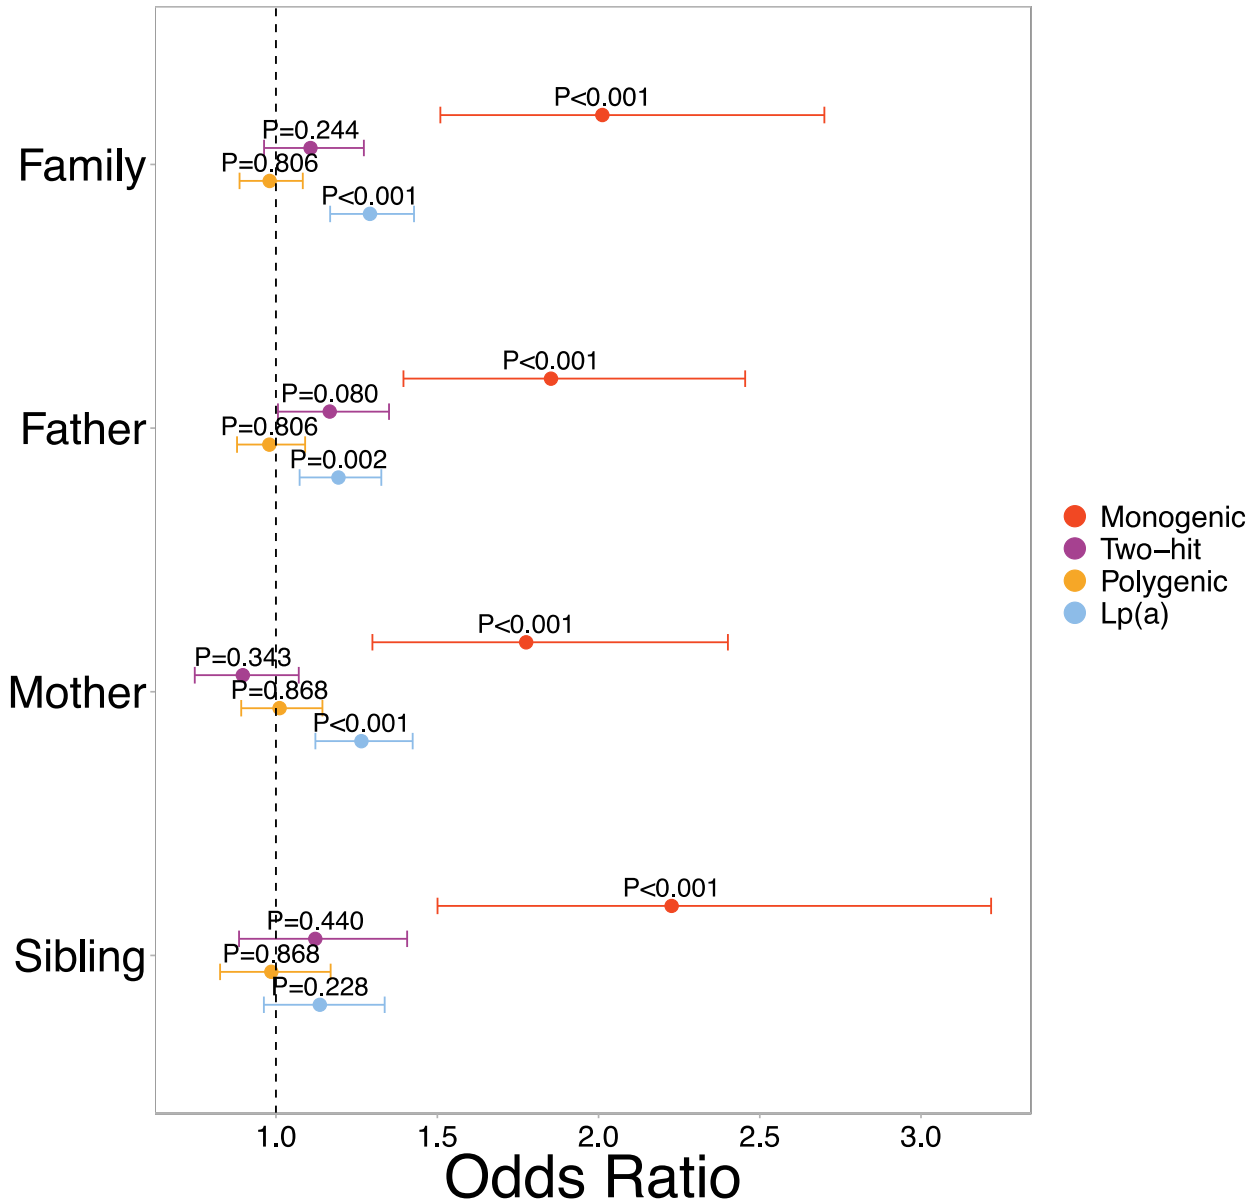



**Figure S4. 10-year incident CAD risk by monogenic FH gene.** Kaplan-Meier plots show 10-year incident ASCVD risk among UK Biobank participants with *PCSK9* (n=6), *APOB* (n=65), *LDLR* Moderate (n=99), and *LDLR* predicted loss-of-function (n=17) monogenic FH variants relative to the non-genetic hypercholesterolemia subtype. Cox proportional-hazard ratios and 95% confidence intervals are shown.  
<sup>1</sup>Cox proportional hazard ratio cannot be calculated when no events occur.

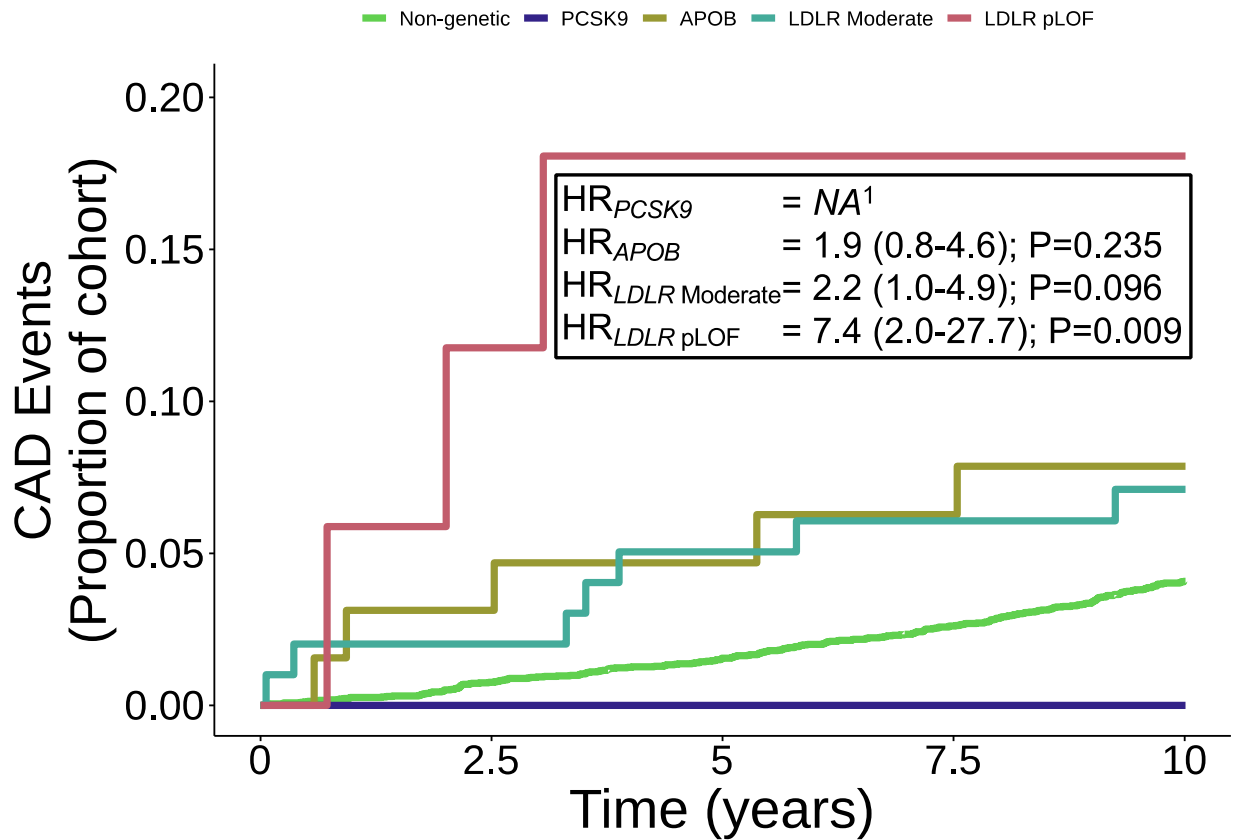

**Figure S5. Severe hypercholesterolemia stratified by genetic subtype using genetically predicted Lp(a).** Kaplan-Meier plots show 10-year incident ASCVD risk among UK Biobank participants with severe hypercholesterolemia. Participants were binned by severe hypercholesterolemia subtype and compared to the non-genetic hypercholesterolemia subtype. The two-hit and elevated Lp(a) subtypes were defined by having genetically predicted Lp(a)  $\geq 125$ nmol/L. Cox proportional-hazard ratios and 95% confidence intervals adjusted for CAD risk factors and principal components of ancestry are shown.

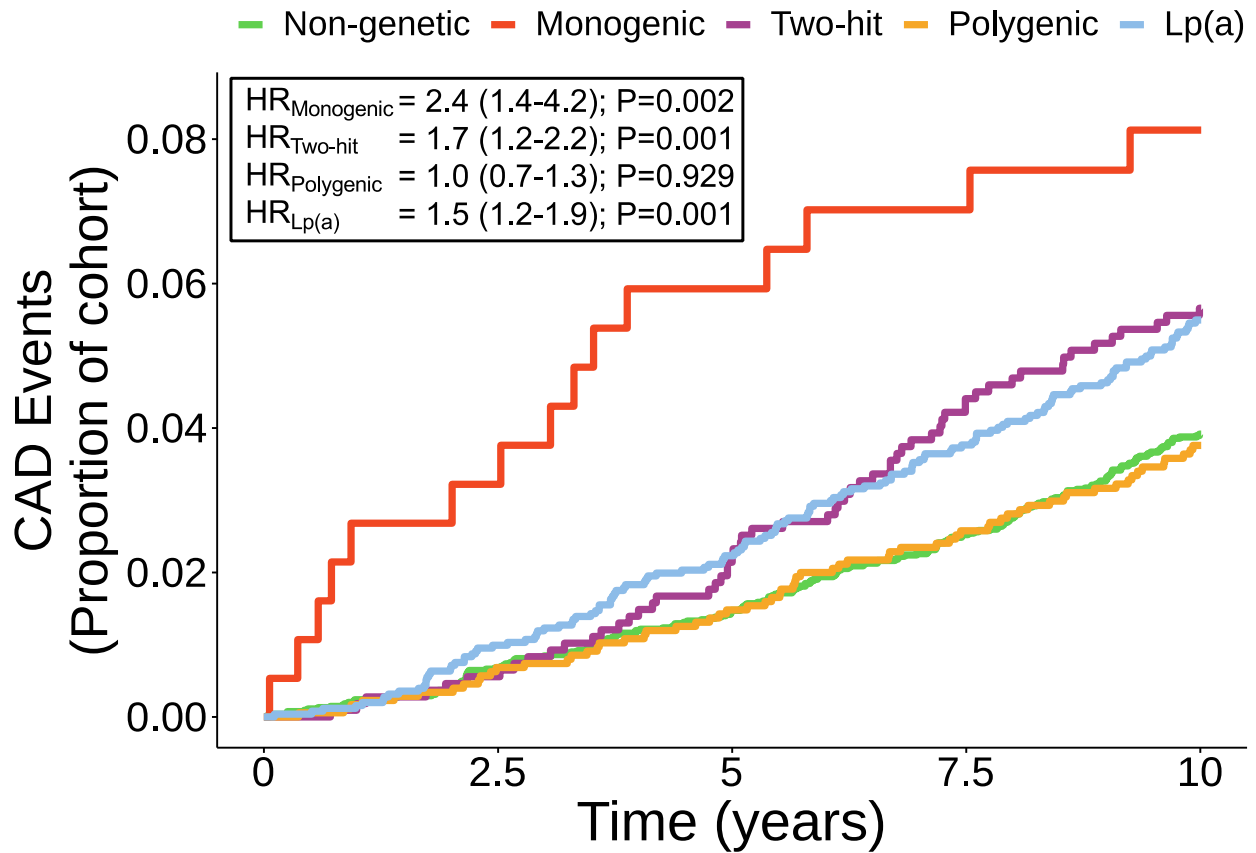

**Figure S6. Severe hypercholesterolemia stratified by LDL-C and genetic subtype in males and females.** Kaplan-Meier plots show 10-year incident ASCVD risk among UK Biobank participants with severe hypercholesterolemia. A) Male and C) female participants were binned by LLM-adjusted LDL-C and compared to those with LDL-C  $\geq 190$ mg/dL and  $< 210$ mg/dL. B) Male and D) female participants were binned by severe hypercholesterolemia subtype and compared to the non-genetic hypercholesterolemia subtype. Cox proportional-hazard ratios and 95% confidence intervals adjusted for CAD risk factors and principal components of ancestry are shown.

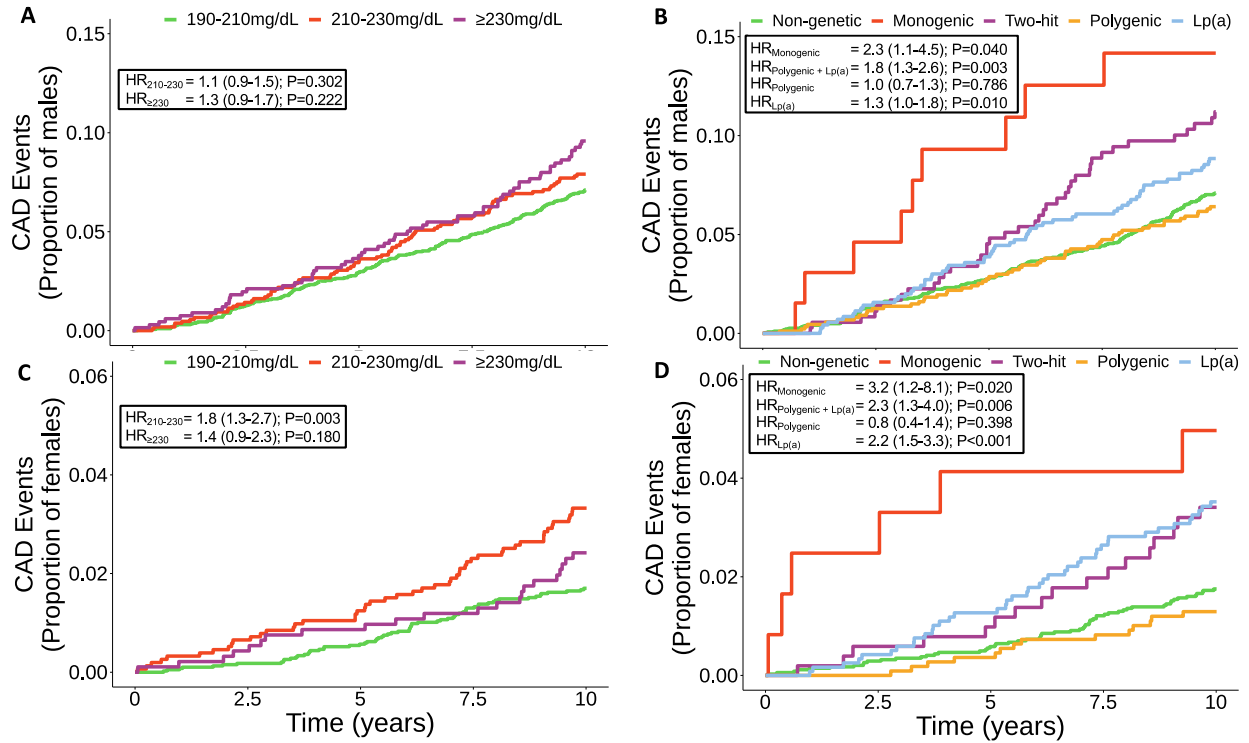

**Figure S7. LLM use by monogenic FH variant.** Among participants with the monogenic FH subtype and without prevalent CVD, A) the percent taking lipid-lowering medication at baseline is shown for each variant.

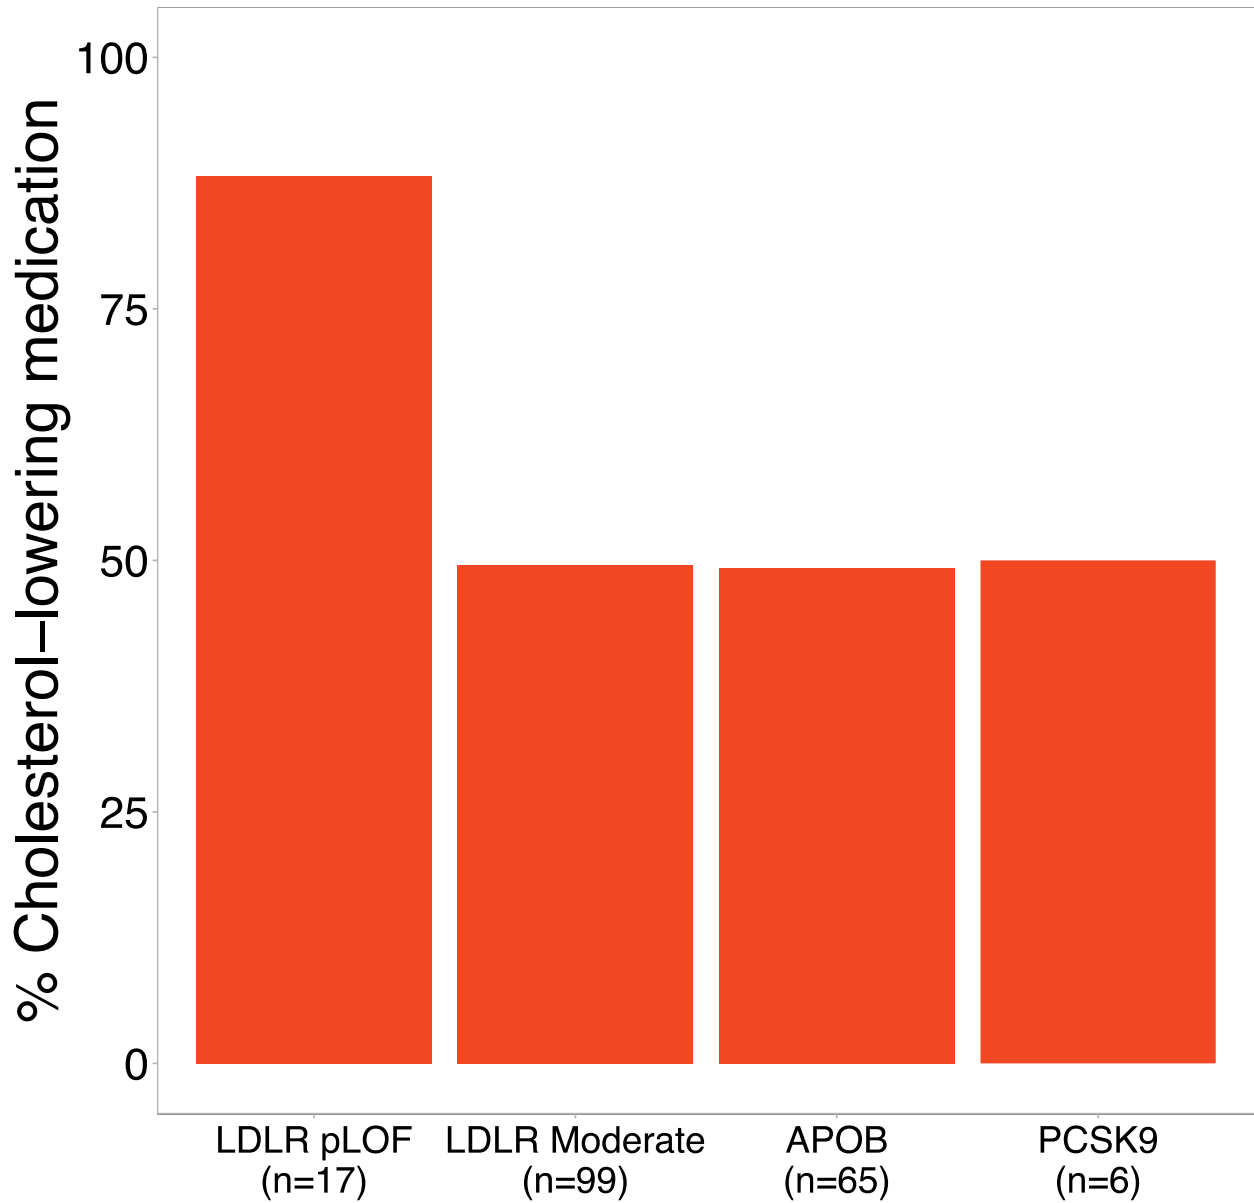

**Table S1. Monogenic FH variant list.**

| Group         | Chr | Pos (hg38) | Ref  | Alt | HGVSc                    | Consequence      |
|---------------|-----|------------|------|-----|--------------------------|------------------|
| APOB          | 2   | 21006288   | C    | T   | NM_000384.2:c.10580G>A   | missense_variant |
| APOB          | 2   | 21006289   | G    | A   | NM_000384.2:c.10579C>T   | missense_variant |
| LDLR_MODERATE | 19  | 11100291   | T    | G   | NM_000527.4:c.136T>G     | missense_variant |
| LDLR_MODERATE | 19  | 11102714   | C    | T   | NM_000527.4:c.241C>T     | missense_variant |
| LDLR_MODERATE | 19  | 11102732   | T    | G   | NM_000527.4:c.259T>G     | missense_variant |
| LDLR_MODERATE | 19  | 11102739   | G    | A   | NM_000527.4:c.266G>A     | missense_variant |
| LDLR_MODERATE | 19  | 11102774   | G    | A   | NM_000527.4:c.301G>A     | missense_variant |
| LDLR_MODERATE | 19  | 11105243   | G    | A   | NM_000527.4:c.337G>A     | missense_variant |
| LDLR_MODERATE | 19  | 11105324   | G    | A   | NM_000527.4:c.418G>A     | missense_variant |
| LDLR_MODERATE | 19  | 11105408   | G    | A   | NM_000527.4:c.502G>A     | missense_variant |
| LDLR_MODERATE | 19  | 11105556   | ATGG | A   | NM_000527.4:c.654_656del | inframe_deletion |
| LDLR_MODERATE | 19  | 11105567   | G    | A   | NM_000527.4:c.661G>A     | missense_variant |
| LDLR_MODERATE | 19  | 11105568   | A    | G   | NM_000527.4:c.662A>G     | missense_variant |
| LDLR_MODERATE | 19  | 11105587   | C    | G   | NM_000527.4:c.681C>G     | missense_variant |
| LDLR_MODERATE | 19  | 11105588   | G    | C   | NM_000527.4:c.682G>C     | missense_variant |
| LDLR_MODERATE | 19  | 11106588   | G    | A   | NM_000527.4:c.718G>A     | missense_variant |
| LDLR_MODERATE | 19  | 11106631   | A    | C   | NM_000527.4:c.761A>C     | missense_variant |
| LDLR_MODERATE | 19  | 11107436   | G    | A   | NM_000527.4:c.862G>A     | missense_variant |
| LDLR_MODERATE | 19  | 11107461   | G    | A   | NM_000527.4:c.887G>A     | missense_variant |
| LDLR_MODERATE | 19  | 11107484   | G    | A   | NM_000527.4:c.910G>A     | missense_variant |

|               |    |          |   |   |                       |                                        |
|---------------|----|----------|---|---|-----------------------|----------------------------------------|
| LDLR_MODERATE | 19 | 11107486 | C | G | NM_000527.4:c.912C>G  | missense_variant                       |
| LDLR_MODERATE | 19 | 11107512 | G | A | NM_000527.4:c.938G>A  | missense_variant&splice_region_variant |
| LDLR_MODERATE | 19 | 11110714 | G | A | NM_000527.4:c.1003G>A | missense_variant                       |
| LDLR_MODERATE | 19 | 11111514 | A | G | NM_000527.4:c.1061A>G | missense_variant&splice_region_variant |
| LDLR_MODERATE | 19 | 11111571 | G | A | NM_000527.4:c.1118G>A | missense_variant                       |
| LDLR_MODERATE | 19 | 11113307 | C | T | NM_000527.4:c.1216C>T | missense_variant                       |
| LDLR_MODERATE | 19 | 11113313 | G | A | NM_000527.4:c.1222G>A | missense_variant                       |
| LDLR_MODERATE | 19 | 11113322 | A | G | NM_000527.4:c.1231A>G | missense_variant                       |
| LDLR_MODERATE | 19 | 11113337 | C | T | NM_000527.4:c.1246C>T | missense_variant                       |
| LDLR_MODERATE | 19 | 11113343 | G | A | NM_000527.4:c.1252G>A | missense_variant                       |
| LDLR_MODERATE | 19 | 11113376 | G | A | NM_000527.4:c.1285G>A | missense_variant                       |
| LDLR_MODERATE | 19 | 11113590 | G | T | NM_000527.4:c.1414G>T | missense_variant                       |
| LDLR_MODERATE | 19 | 11113600 | C | T | NM_000527.4:c.1424C>T | missense_variant                       |
| LDLR_MODERATE | 19 | 11113612 | T | C | NM_000527.4:c.1436T>C | missense_variant                       |
| LDLR_MODERATE | 19 | 11113620 | G | A | NM_000527.4:c.1444G>A | missense_variant                       |
| LDLR_MODERATE | 19 | 11113650 | G | A | NM_000527.4:c.1474G>A | missense_variant                       |
| LDLR_MODERATE | 19 | 11113678 | C | T | NM_000527.4:c.1502C>T | missense_variant                       |
| LDLR_MODERATE | 19 | 11113743 | G | A | NM_000527.4:c.1567G>A | missense_variant                       |
| LDLR_MODERATE | 19 | 11116125 | G | A | NM_000527.4:c.1618G>A | missense_variant                       |
| LDLR_MODERATE | 19 | 11116141 | G | A | NM_000527.4:c.1634G>A | missense_variant                       |
| LDLR_MODERATE | 19 | 11116198 | A | G | NM_000527.4:c.1691A>G | missense_variant                       |
| LDLR_MODERATE | 19 | 11116873 | C | T | NM_000527.4:c.1720C>T | missense_variant                       |

|               |    |          |                                |        |                            |                                              |
|---------------|----|----------|--------------------------------|--------|----------------------------|----------------------------------------------|
| LDLR_MODERATE | 19 | 11116898 | T                              | C      | NM_000527.4:c.1745T>C      | missense_variant                             |
| LDLR_MODERATE | 19 | 11116900 | C                              | T      | NM_000527.4:c.1747C>T      | missense_variant                             |
| LDLR_MODERATE | 19 | 11116901 | A                              | G      | NM_000527.4:c.1748A>G      | missense_variant                             |
| LDLR_MODERATE | 19 | 11116928 | G                              | A      | NM_000527.4:c.1775G>A      | missense_variant                             |
| LDLR_MODERATE | 19 | 11116936 | C                              | T      | NM_000527.4:c.1783C>T      | missense_variant                             |
| LDLR_MODERATE | 19 | 11116976 | C                              | G      | NM_000527.4:c.1823C>G      | missense_variant                             |
| LDLR_MODERATE | 19 | 11120106 | G                              | T      | NM_000527.4:c.1860G>T      | missense_variant                             |
| LDLR_MODERATE | 19 | 11120110 | G                              | A      | NM_000527.4:c.1864G>A      | missense_variant                             |
| LDLR_MODERATE | 19 | 11120143 | C                              | T      | NM_000527.4:c.1897C>T      | missense_variant                             |
| LDLR_MODERATE | 19 | 11120144 | G                              | A      | NM_000527.4:c.1898G>A      | missense_variant                             |
| LDLR_MODERATE | 19 | 11120411 | T                              | C      | NM_000527.4:c.2029T>C      | missense_variant                             |
| LDLR_MODERATE | 19 | 11120436 | C                              | T      | NM_000527.4:c.2054C>T      | missense_variant                             |
| LDLR_pLOF     | 19 | 11100272 | CA                             | C      | NM_000527.4:c.118del       | frameshift_variant                           |
| LDLR_pLOF     | 19 | 11102662 | A                              | G      | NM_000527.4:c.191-2A>G     | splice_acceptor_variant                      |
| LDLR_pLOF     | 19 | 11102683 | C<br>G                         | C      | NM_000527.4:c.214del       | frameshift_variant                           |
| LDLR_pLOF     | 19 | 11102785 | TC<br>G                        | T      | NM_000527.4:c.313_313+1del | splice_donor_variant&coding_sequence_variant |
| LDLR_pLOF     | 19 | 11102787 | G                              | G<br>T | NM_000527.4:c.313+2dup     | splice_donor_variant                         |
| LDLR_pLOF     | 19 | 11102787 | G                              | A      | NM_000527.4:c.313+1G>A     | splice_donor_variant                         |
| LDLR_pLOF     | 19 | 11102787 | G                              | C      | NM_000527.4:c.313+1G>C     | splice_donor_variant                         |
| LDLR_pLOF     | 19 | 11105339 | GT<br>G<br>CT<br>CA<br>C<br>CT | G      | NM_000527.4:c.435_457del   | frameshift_variant                           |

|           |    |          |                                                        |   |                                |                                                          |
|-----------|----|----------|--------------------------------------------------------|---|--------------------------------|----------------------------------------------------------|
|           |    |          | GT<br>G<br>GT<br>C<br>C<br>C<br>G<br>C<br>CA<br>G<br>C |   |                                |                                                          |
| LDLR_pLOF | 19 | 11105407 | C                                                      | A | NM_000527.4:c.501C>A           | stop_gained                                              |
| LDLR_pLOF | 19 | 11105415 | AC                                                     | A | NM_000527.4:c.513del           | frameshift_variant                                       |
| LDLR_pLOF | 19 | 11105470 | C                                                      | G | NM_000527.4:c.564C>G           | stop_gained                                              |
| LDLR_pLOF | 19 | 11105579 | A                                                      | T | NM_000527.4:c.673A>T           | stop_gained                                              |
| LDLR_pLOF | 19 | 11105585 | G<br>AC                                                | G | NM_000527.4:c.680_681<br>del   | frameshift_variant                                       |
| LDLR_pLOF | 19 | 11105588 | G                                                      | T | NM_000527.4:c.682G>T           | stop_gained                                              |
| LDLR_pLOF | 19 | 11105589 | A<br>G                                                 | A | NM_000527.4:c.684del           | frameshift_variant                                       |
| LDLR_pLOF | 19 | 11107504 | CA                                                     | C | NM_000527.4:c.933del           | frameshift_variant                                       |
| LDLR_pLOF | 19 | 11110759 | C                                                      | T | NM_000527.4:c.1048C>T          | stop_gained                                              |
| LDLR_pLOF | 19 | 11110764 | AT<br>G<br>C<br>G<br>AA<br>G<br>G                      | A | NM_000527.4:c.1056_10<br>60+3d | splice_donor_v<br>ariant&coding_<br>sequence_vari<br>ant |
| LDLR_pLOF | 19 | 11113268 | G                                                      | A | NM_000527.4:c.1187-<br>10G>A   | intron_variant                                           |
| LDLR_pLOF | 19 | 11113295 | TT<br>C                                                | T | NM_000527.4:c.1206_12<br>07del | frameshift_vari<br>ant                                   |
| LDLR_pLOF | 19 | 11113348 | C                                                      | G | NM_000527.4:c.1257C><br>G      | stop_gained                                              |
| LDLR_pLOF | 19 | 11113554 | CA                                                     | C | NM_000527.4:c.1379del          | frameshift_vari<br>ant                                   |
| LDLR_pLOF | 19 | 11113559 | C<br>G                                                 | C | NM_000527.4:c.1384del          | frameshift_vari<br>ant                                   |
| LDLR_pLOF | 19 | 11113767 | G                                                      | A | NM_000527.4:c.1586+5G<br>>A    | splice_region_<br>variant&intron_<br>variant             |



|           |    |          |                                  |        |                            |                         |
|-----------|----|----------|----------------------------------|--------|----------------------------|-------------------------|
| LDLR_pLOF | 19 | 11116114 | G                                | A      | NM_000527.4:c.1607G>A      | stop_gained             |
| LDLR_pLOF | 19 | 11116139 | A<br>G                           | A      | NM_000527.4:c.1637del      | frameshift_variant      |
| LDLR_pLOF | 19 | 11116951 | G<br>A<br>G<br>G<br>AT<br>G<br>A | G      | NM_000527.4:c.1800_1806del | frameshift_variant      |
| LDLR_pLOF | 19 | 11120091 | G                                | A      | NM_000527.4:c.1846-1G>A    | splice_acceptor_variant |
| LDLR_pLOF | 19 | 11120110 | G<br>AT                          | G      | NM_000527.4:c.1867_1868del | frameshift_variant      |
| LDLR_pLOF | 19 | 11120419 | T                                | A      | NM_000527.4:c.2037T>A      | stop_gained             |
| LDLR_pLOF | 19 | 11120442 | T                                | T<br>C | NM_000527.4:c.2061dup      | frameshift_variant      |
| LDLR_pLOF | 19 | 11123200 | G                                | T      | NM_000527.4:c.2167G>T      | stop_gained             |
| LDLR_pLOF | 19 | 11123324 | TA                               | T      | NM_000527.4:c.2292del      | frameshift_variant      |
| LDLR_pLOF | 19 | 11128027 | C                                | C<br>A | NM_000527.4:c.2332dup      | frameshift_variant      |
| PCSK9     | 1  | 55039931 | G                                | A      | NM_174936.3:c.94G>A        | missense_variant        |
| PCSK9     | 1  | 55057454 | G                                | T      | NM_174936.3:c.1120G>T      | missense_variant        |
| PCSK9     | 1  | 55058630 | C                                | T      | NM_174936.3:c.1486C>T      | missense_variant        |

**Table S2. UK Biobank codes and measurements used for identification of secondary exclusions of FH.** Having any codes in this table was considered a secondary cause of FH.

| Diagnosis                         | EHR-<br>documentation |        | Self-reported                                |                                             | UK<br>Biobank<br>field ID |
|-----------------------------------|-----------------------|--------|----------------------------------------------|---------------------------------------------|---------------------------|
|                                   | ICD-9                 | ICD-10 | Non-<br>cancer<br>illness<br>code<br>(20002) | Treatment/<br>Medication<br>Code<br>(20003) |                           |
| Hypothyroidism                    | 243                   | E03    | 1226                                         | 1141191044                                  |                           |
|                                   | 244                   |        |                                              | 1140884516                                  |                           |
|                                   |                       |        |                                              | 1140874852                                  |                           |
|                                   |                       |        |                                              | 1140910814                                  |                           |
|                                   |                       |        |                                              | 1141178036                                  |                           |
|                                   |                       |        |                                              | 1140884512                                  |                           |
|                                   |                       |        |                                              | 1140910520                                  |                           |
|                                   |                       |        |                                              | 1140910518                                  |                           |
| Obstructive Liver<br>Disease      | 5762                  | K83.1  | 1159                                         |                                             |                           |
|                                   |                       |        | 1160                                         |                                             |                           |
| Nephrotic Syndrome                | 581                   | N04    | 1609                                         |                                             |                           |
| Alkaline Phosphatase ><br>200 U/L |                       |        |                                              |                                             | 30610                     |
| Triglycerides > 400<br>mg/dL      |                       |        |                                              |                                             | 30870                     |

**Table S3. UK Biobank codes used for identification of lipid-lowering medication use.**

|                     | <b>Medication for cholesterol (6153)</b> | <b>Medication for cholesterol (6177)</b> | <b>Treatment/ Medication Code (20003)</b> |
|---------------------|------------------------------------------|------------------------------------------|-------------------------------------------|
| <b>Any LLM</b>      | 1                                        | 1                                        | All codes below                           |
| <b>Simvastatin</b>  |                                          |                                          | 1140861958                                |
|                     |                                          |                                          | 1140910652                                |
|                     |                                          |                                          | 1140881748                                |
|                     |                                          |                                          | 1141200040                                |
|                     |                                          |                                          | 1141188146                                |
|                     |                                          |                                          | 1140910654                                |
| <b>Pravastatin</b>  |                                          |                                          | 1140888648                                |
|                     |                                          |                                          | 1140910632                                |
|                     |                                          |                                          | 1140861970                                |
| <b>Fluvastatin</b>  |                                          |                                          | 1140888594                                |
|                     |                                          |                                          | 1140864592                                |
| <b>Atorvastatin</b> |                                          |                                          | 1141146234                                |
|                     |                                          |                                          | 1141146138                                |
| <b>Rosuvastatin</b> |                                          |                                          | 1141192410                                |
|                     |                                          |                                          | 1141187780                                |
|                     |                                          |                                          | 1141192414                                |

**Table S4. LDL Polygenic score correlation with adjusted and unadjusted LDL-C.** Pearson correlation coefficients are shown for the LLM-untreated cohort and the total cohort when using LDL-C without adjustment for LLM and LDL-C adjusted for LLM.

| <b>Cohort</b> | <b>LDL</b> | <b>r</b> | <b>t</b> | <b>df</b> | <b>p</b> |
|---------------|------------|----------|----------|-----------|----------|
| Untreated     | Unadjusted | 0.41     | 145.9    | 108,258   | <0.001   |
| Total         | Unadjusted | 0.31     | 115.6    | 130,089   | <0.001   |
| Total         | Adjusted   | 0.39     | 151.8    | 130,089   | <0.001   |

**Table S5. Monogenic variant correlation with adjusted and unadjusted LDL-C.** Coefficients (with 95% confidence intervals) and p-values for the generalized linear models are shown for the LLM-untreated cohort and the total cohort when using LDL-C without adjustment for LLM and LDL-C adjusted for LLM.

| <b>Cohort</b> | <b>LDL</b> | <b>Estimate (95% CI)</b> | <b>p-value</b> |
|---------------|------------|--------------------------|----------------|
| Untreated     | Unadjusted | 59.4 (54.6 – 64.1)       | 4.4E-133       |
| Total         | Unadjusted | 31.6 (28.1 – 35.0)       | 1.9E-72        |
| Total         | Adjusted   | 58.3 (55.0 – 61.7)       | 1.3E-254       |

**Table S6. Determinant and subtype definitions.**

| <b>Determinant of severe hypercholesterolemia</b> | <b>Determinant N</b> | <b>Determinant definition</b>                                    | <b>Subtype</b>                         | <b>Subtype N<sup>1</sup></b> |
|---------------------------------------------------|----------------------|------------------------------------------------------------------|----------------------------------------|------------------------------|
| FH Variant                                        | 357                  | P/LP variant in an FH gene                                       | Monogenic FH                           | 204                          |
| LDL-C PRS top decile                              | 9,657                | PRS in the top decile,<br>Lp(a) < 125nmol/L,<br>no FH variant    | Polygenic<br>hypercholesterolemia      | 2,070                        |
| Lp(a)≥125nmol/L                                   | 17,940               | Lp(a) ≥ 125nmol/L,<br>PRS below the top decile,<br>no FH variant | Elevated Lp(a)<br>hypercholesterolemia | 2,023                        |
| LDL-C PRS top decile &<br>Lp(a)≥125nmol/L         | 3,325                | Lp(a) ≥ 125nmol/L,<br>PRS in the top decile,<br>no FH variant    | Two-hit<br>hypercholesterolemia        | 913                          |
| Control                                           | 98,812               | Lp(a) < 125nmol/L,<br>PRS below the top decile,<br>no FH variant | Non-genetic<br>hypercholesterolemia    | 6,528                        |

<sup>1</sup>Subtype N was calculated before excluding prevalent CVD.

**Table S7. UK Biobank codes used for identification of CAD and comorbidities**

| Diagnoses | EHR-documentation |        |         | Self-reported                    |                                                           |                                                    |
|-----------|-------------------|--------|---------|----------------------------------|-----------------------------------------------------------|----------------------------------------------------|
|           | ICD-9             | ICD-10 | OPCS-4  | Non-cancer illness code (20002)  | Operation code (20004)                                    | Vascular/heart problems diagnosed by doctor (6150) |
| CAD       | 410               | I21    | K40.1-4 | 1075: Heart attack               | 1070: Coronary angioplasty                                | 1: Heart attack                                    |
|           | 411               | I22    | K41.1-4 |                                  | 1095: Coronary artery bypass graft                        |                                                    |
|           | 412               | I23    | K45.1-5 |                                  |                                                           |                                                    |
|           | 429.79            | I24.1  | K49.1-2 |                                  |                                                           |                                                    |
|           |                   | I25.2  | K49.8-9 |                                  |                                                           |                                                    |
|           |                   |        | K50.2   |                                  |                                                           |                                                    |
|           |                   |        | K75.1-4 |                                  |                                                           |                                                    |
|           |                   |        | K75.8-9 |                                  |                                                           |                                                    |
| CVD       | 410               | G45    | K40     | 1074: Angina                     | 1070: Coronary angioplasty                                | 1: Heart attack                                    |
|           | 411               | I20    | K41     | 1075: Heart attack               | 1071: Other arterial surgery/revascularization procedures | 2: Angina                                          |
|           | 412               | I21    | K42     | 1082: Transient ischaemic attack | 1095: Coronary artery bypass graft                        | 3: Stroke                                          |
|           | 413               | I22    | K43     | 1583: Ischaemic stroke           | 1109: Carotid artery angioplasty                          |                                                    |
|           | 414               | I23    | K44     |                                  | 1514: Coronary angiogram                                  |                                                    |
|           | 434               | I24    | K45     |                                  |                                                           |                                                    |
|           | 436               | I25    | K46     |                                  |                                                           |                                                    |
|           |                   | I63    | K47.1   |                                  |                                                           |                                                    |
|           |                   | I64    | K49     |                                  |                                                           |                                                    |
|           |                   |        | K50     |                                  |                                                           |                                                    |

|            |             |             |     |  |  |  |
|------------|-------------|-------------|-----|--|--|--|
|            |             |             | K75 |  |  |  |
| <b>PAD</b> | 440         | 170         | L50 |  |  |  |
|            | 443.8<br>-9 | 173.8<br>-9 | L51 |  |  |  |
|            | 444         | 174         | L52 |  |  |  |
|            |             |             | L54 |  |  |  |
|            |             |             | L58 |  |  |  |
|            |             |             | L59 |  |  |  |
|            |             |             | L60 |  |  |  |
|            |             |             | L63 |  |  |  |
|            |             |             | X09 |  |  |  |
| <b>AVS</b> |             | 1350        |     |  |  |  |
|            |             | 1352        |     |  |  |  |



**Table S8. Familial hypercholesterolemia variant counts.**

| <b>Variant</b>        | <b>Sample Size (n)</b> |
|-----------------------|------------------------|
| <i>LDLR</i> pLOF      | 35                     |
| <i>LDLR</i> missense  | 191                    |
| <i>APOB</i> missense  | 114                    |
| <i>PCSK9</i> missense | 17                     |

**Table S9. Prevalence in the cohort, odds ratios of having severe hypercholesterolemia, population attributable fraction of severe hypercholesterolemia, and attributable risk proportion of severe hypercholesterolemia for each genetic determinant of severe hypercholesterolemia.**

| <b>Determinant</b>     | <b>Prevalence (%)</b> | <b>OR (95% CI)</b> | <b>PAF (%) (95% CI)</b> | <b>ARP (%) (95% CI)</b> |
|------------------------|-----------------------|--------------------|-------------------------|-------------------------|
| FH Variant             | 0.3                   | 13.9 (11.2-17.2)   | 1.5 (1.3-1.7)           | 84.4 (83.0-85.9)        |
| PRS top decile         | 7.4                   | 3.2 (3.0-3.4)      | 11.0 (10.3-11.7)        | 62.5 (61.0-64.1)        |
| Lp(a) $\geq$ 125nmol/L | 13.8                  | 1.3 (1.2-1.4)      | 4.0 (3.2-4.7)           | 23.2 (19.7-26.7)        |
| PRS + Lp(a)            | 2.6                   | 4.1 (3.7-4.4)      | 5.4 (4.9-5.8)           | 68.9 (67.1-70.7)        |

All values are relative to the population after removing those with the determinant-of-interest, as opposed to relative to controls without a determinant.

Abbreviations: OR = Odds Ratio; PAF = Population Attributable Fraction; ARP = Attributable Risk Proportion

**Table S10. Absolute 10-year incident CAD risk.**

| <b>Comparison</b>                       | <b>Absolute risk difference (%) (95% CI)</b> |
|-----------------------------------------|----------------------------------------------|
| LDL 210-230 vs LDL 190-210              | 1.2 (0.4-2.5)                                |
| LDL $\geq$ 230 vs LDL 190-210           | 1.2 (0.2-2.6)                                |
| Monogenic vs non-genetic                | 4.8 (0.8-8.1)                                |
| Two-hit vs non-genetic                  | 3.3 (1.5-5.5)                                |
| Elevated Lp(a) vs non-genetic           | 2.0 (1.0-3.4)                                |
| Monogenic vs non-genetic treated        | 9.2 (0.7-18.3)                               |
| Two-hit vs non-genetic treated          | 3.7 (0.3-7.2)                                |
| Monogenic vs non-genetic untreated      | 1.6 (-2.8-6.4)                               |
| Two-hit vs non-genetic untreated        | 3.1 (0.9-4.8)                                |
| Elevated Lp(a) vs non-genetic untreated | 2.4 (1.2-3.7)                                |

**Table S11. 10-year incident ASCVD risk re-defining polygenic FH.** Cox proportional-hazard ratios for 10-year incident ASCVD risk in severe hypercholesterolemic UK Biobank participants with each FH subtype relative to the non-genetic subtype are shown among all participants. The first model is the result of the main analysis. The second model limits the non-genetic subtype to participants with LDL-C PRS below the 50<sup>th</sup> percentile. The third model limits the non-genetic subtype to participants with LDL-C PRS below the 50<sup>th</sup> percentile, and re-defines the two-hit and polygenic subtypes to include participants with LDL-C PRS above the 75<sup>th</sup> percentile with or without elevated Lp(a), respectively. 95% confidence intervals are shown in parentheses.

|                                                                                                                                                                                                                                     | <b>FH subtype vs non-genetic</b> | <b>HR (95% CI)</b> | <b>P-value</b>         |
|-------------------------------------------------------------------------------------------------------------------------------------------------------------------------------------------------------------------------------------|----------------------------------|--------------------|------------------------|
| <b>Original</b>                                                                                                                                                                                                                     | Monogenic                        | 2.3 (1.4-4.0)      | 2.7 x 10 <sup>-3</sup> |
|                                                                                                                                                                                                                                     | Two-hit                          | 1.9 (1.4-2.6)      | 6.5 x 10 <sup>-5</sup> |
|                                                                                                                                                                                                                                     | Polygenic                        | 0.9 (0.7-1.2)      | 0.51                   |
|                                                                                                                                                                                                                                     | Lp(a)                            | 1.5 (1.2-2.0)      | 5.1 x 10 <sup>-4</sup> |
| <ul style="list-style-type: none"> <li>• <b>Non-genetic includes only those with LDL-C PRS &lt; 50<sup>th</sup> percentile</b></li> </ul>                                                                                           | Monogenic                        | 2.3 (1.3-4.1)      | 1.2 x 10 <sup>-2</sup> |
|                                                                                                                                                                                                                                     | Two-hit                          | 1.8 (1.3-2.6)      | 3.5 x 10 <sup>-3</sup> |
|                                                                                                                                                                                                                                     | Polygenic                        | 0.9 (0.6-1.2)      | 0.43                   |
|                                                                                                                                                                                                                                     | Lp(a)                            | 1.5 (1.1-2.0)      | 1.6 x 10 <sup>-2</sup> |
| <ul style="list-style-type: none"> <li>• <b>Non-genetic includes only those with LDL-C PRS &lt; 50<sup>th</sup> percentile</b></li> <li>• <b>Two-hit and Polygenic include LDL-C PRS &gt; 75<sup>th</sup> percentile</b></li> </ul> | Monogenic                        | 2.4 (1.3-4.2)      | 7.1 x 10 <sup>-3</sup> |
|                                                                                                                                                                                                                                     | Two-hit                          | 1.6 (1.2-2.2)      | 7.1 x 10 <sup>-3</sup> |
|                                                                                                                                                                                                                                     | Polygenic                        | 0.9 (0.7-1.2)      | 0.68                   |
|                                                                                                                                                                                                                                     | Lp(a)                            | 1.6 (1.1-2.2)      | 7.1 x 10 <sup>-3</sup> |

**Table S12. Clinical characteristics and comorbidities of LLM-treated vs untreated.** Differences in baseline clinical risk factors and prevalence of comorbidities in those taking LLM at baseline were compared to those untreated with LLM. Standard deviations are shown for continuous traits and odds ratios for binary traits with 95% confidence intervals. (T1D=type 1 diabetes; T2D=type 2 diabetes; CAD=coronary artery disease; CVD=cardiovascular disease; PAD=peripheral artery disease; AVS=aortic valve stenosis).

|                                                    | <b>Treated</b> | <b>Untreated</b> | <b>SD/OR (95% CI)</b> | <b>Adj. P value</b> |
|----------------------------------------------------|----------------|------------------|-----------------------|---------------------|
| <b>Sample Size (N)</b>                             | 3594           | 8144             | NA                    | NA                  |
| <b>Age (Mean (SD))</b>                             | 60.54 (6.28)   | 57.83 (7.17)     | 0.41 (0.38-0.44)      | P < 0.001           |
| <b>Sex (% Female)</b>                              | 44             | 62.3             | 2.62 (2.41-2.85)      | P < 0.001           |
| <b>LDL (mg/dL) ((Mean (SD))</b>                    | 154.59 (21.78) | 207.6 (16.77)    | -1.57 (-1.6--1.55)    | P < 0.001           |
| <b>LDL (est. untreated) (mg/dL) ((Mean (SD))</b>   | 220.84 (31.11) | 207.6 (16.77)    | 0.43 (0.4-0.45)       | P < 0.001           |
| <b>BMI (Mean (SD))</b>                             | 29.11 (4.65)   | 27.58 (4.08)     | 0.37 (0.33-0.41)      | P < 0.001           |
| <b>Systolic BP (mmHg) (Mean (SD))</b>              | 144.44 (18.22) | 141.69 (18.61)   | 0 (-0.04-0.03)        | 0.804               |
| <b>HDL (mg/dL) (Mean (SD))</b>                     | 53.72 (12.72)  | 59.43 (13.1)     | -0.32 (-0.35--0.28)   | P < 0.001           |
| <b>Triglycerides (mg/dL) (Mean (SD))</b>           | 191.81 (77.63) | 187.47 (73.12)   | 0.03 (-0.01-0.07)     | 0.143               |
| <b>AHA Lifestyle Score<sup>1</sup> (Mean (SD))</b> | 0.96 (0.44)    | 1.03 (0.43)      | -0.47 (-0.59--0.36)   | P < 0.001           |

|                                                           |                 |                |                    |           |
|-----------------------------------------------------------|-----------------|----------------|--------------------|-----------|
| <b>Townsend Deprivation Index<sup>2</sup> (Mean (SD))</b> | -1.28 (3.02)    | -1.71 (2.82)   | 0.19 (0.15-0.23)   | P < 0.001 |
| <b>BP meds (%)</b>                                        | 51.3            | 10.6           | 8.37 (7.57-9.26)   | P < 0.001 |
| <b>Smoking (%)</b>                                        | 12.3            | 9.9            | 1.45 (1.27-1.65)   | P < 0.001 |
| <b>Prevalent T1D (%)</b>                                  | 23/3594 (0.6)   | 4/8144 (0)     | 19.27 (6.53-56.87) | P < 0.001 |
| <b>Prevalent T2D (%)</b>                                  | 372/3594 (10.4) | 116/8144 (1.4) | 8.62 (6.92-10.74)  | P < 0.001 |
| <b>Prevalent CAD (%)</b>                                  | 6.5             | 0.1            | 38 (20.05-72)      | P < 0.001 |
| <b>Prevalent CVD (%)</b>                                  | 16.7            | 1.6            | 10.4 (8.51-12.7)   | P < 0.001 |
| <b>Prevalent PAD (%)</b>                                  | 1.1             | 0.1            | 9.58 (4.18-21.97)  | P < 0.001 |
| <b>Prevalent AVS (%)</b>                                  | 0.6             | 0              | 8.54 (2.84-25.71)  | P < 0.001 |

<sup>1</sup>AHA Lifestyle Score: A higher score indicates a more ideal lifestyle (0 = poor, 1 = intermediate, 2 = ideal).

<sup>2</sup>Townsend Deprivation Index: A higher (less negative) score corresponds to a lower socioeconomic status.

**Table S13. 10-year incident CAD risk in treated vs. untreated UK Biobank participants with severe hypercholesterolemia.** Cox proportional-hazard ratios for 10-year incident CAD risk in severe hypercholesterolemic UK Biobank participants treated with LLM at baseline compared to severe hypercholesterolemic participants untreated at baseline are shown. The first model is adjusted for principal components of ancestry only. The second model is adjusted for all clinical risk differences that were significantly different between LLM-treated and untreated from Table S11, except for unadjusted LDL-C. 95% confidence intervals are shown in parentheses.

|                                                    | <b>HR (95% CI)</b> | <b>P-value</b>       |
|----------------------------------------------------|--------------------|----------------------|
| <b>Controlling for PCs only</b>                    | 1.6 (1.3-1.9)      | $7.3 \times 10^{-7}$ |
| <b>Full model controlling for CAD risk factors</b> | 0.7 (0.6-0.9)      | $1.8 \times 10^{-2}$ |

**Table S14. 10-year incident ASCVD risk controlling for body mass index and C reactive protein.** Cox proportional-hazard ratios for 10-year incident ASCVD risk in severe hypercholesterolemic UK Biobank participants with each FH subtype relative to the non-genetic subtype are shown among all participants, participants treated with LLM at baseline, and participants untreated with LLM at baseline. Every model is adjusted for all CAD risk factors from the primary analysis in addition to BMI and C-reactive protein. The model of all participants adjusts for baseline LLM use. 95% confidence intervals are shown in parentheses.

|                         | <b>FH subtype vs non-genetic</b> | <b>HR (95% CI)</b> | <b>Adj. P-value</b>  |
|-------------------------|----------------------------------|--------------------|----------------------|
| <b>All participants</b> | Monogenic                        | 2.4 (1.4-4.1)      | $2.1 \times 10^{-3}$ |
|                         | Two-hit                          | 1.9 (1.4-2.6)      | $4.8 \times 10^{-5}$ |
|                         | Polygenic                        | 0.9 (0.7-1.2)      | 0.52                 |
|                         | Lp(a)                            | 1.5 (1.2-2.0)      | $5.2 \times 10^{-4}$ |
| <b>Treated</b>          | Monogenic                        | 3.1 (1.6-6.0)      | $3.0 \times 10^{-3}$ |
|                         | Two-hit                          | 1.8 (1.1-3.0)      | 0.032                |
|                         | Polygenic                        | 0.9 (0.6-1.4)      | 0.59                 |
|                         | Lp(a)                            | 1.2 (0.8-1.8)      | 0.59                 |
| <b>Untreated</b>        | Monogenic                        | 1.6 (0.6-4.4)      | 0.49                 |
|                         | Two-hit                          | 2.0 (1.4-2.8)      | $7.3 \times 10^{-4}$ |
|                         | Polygenic                        | 0.9 (0.6-1.3)      | 0.54                 |
|                         | Lp(a)                            | 1.7 (1.3-2.3)      | $5.7 \times 10^{-4}$ |
